# Supplementary figures and images for: Weather and climate forecasting with neural networks: using GCMs with different complexity as study-ground
Source: Copernicus journal article supplement (doi:10.5194/gmd-2019-53), 2019-03-04

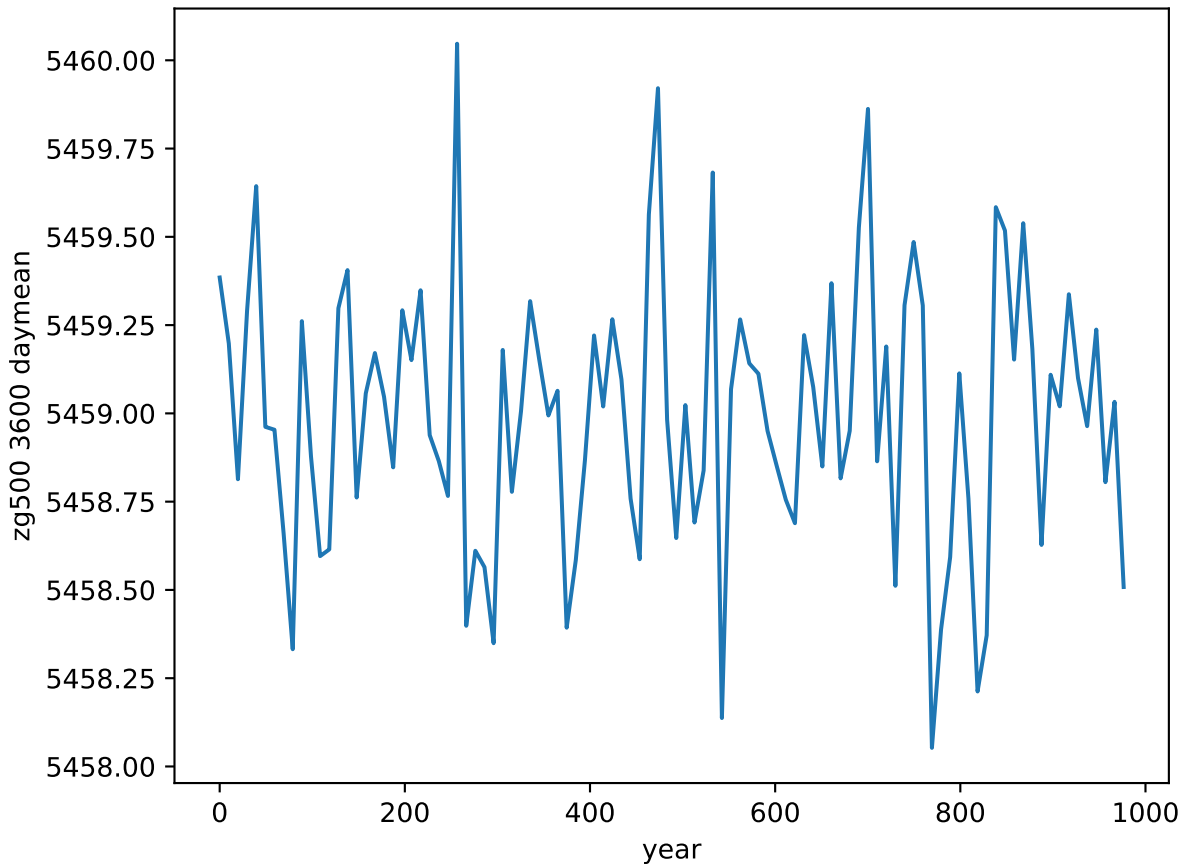

Supplement: Supplementary file 1 [file fig_S10_model_drift_pumat42_zg500.pdf › supplement/supplement_plots/fig_S10_model_drift_pumat42_zg500.pdf]

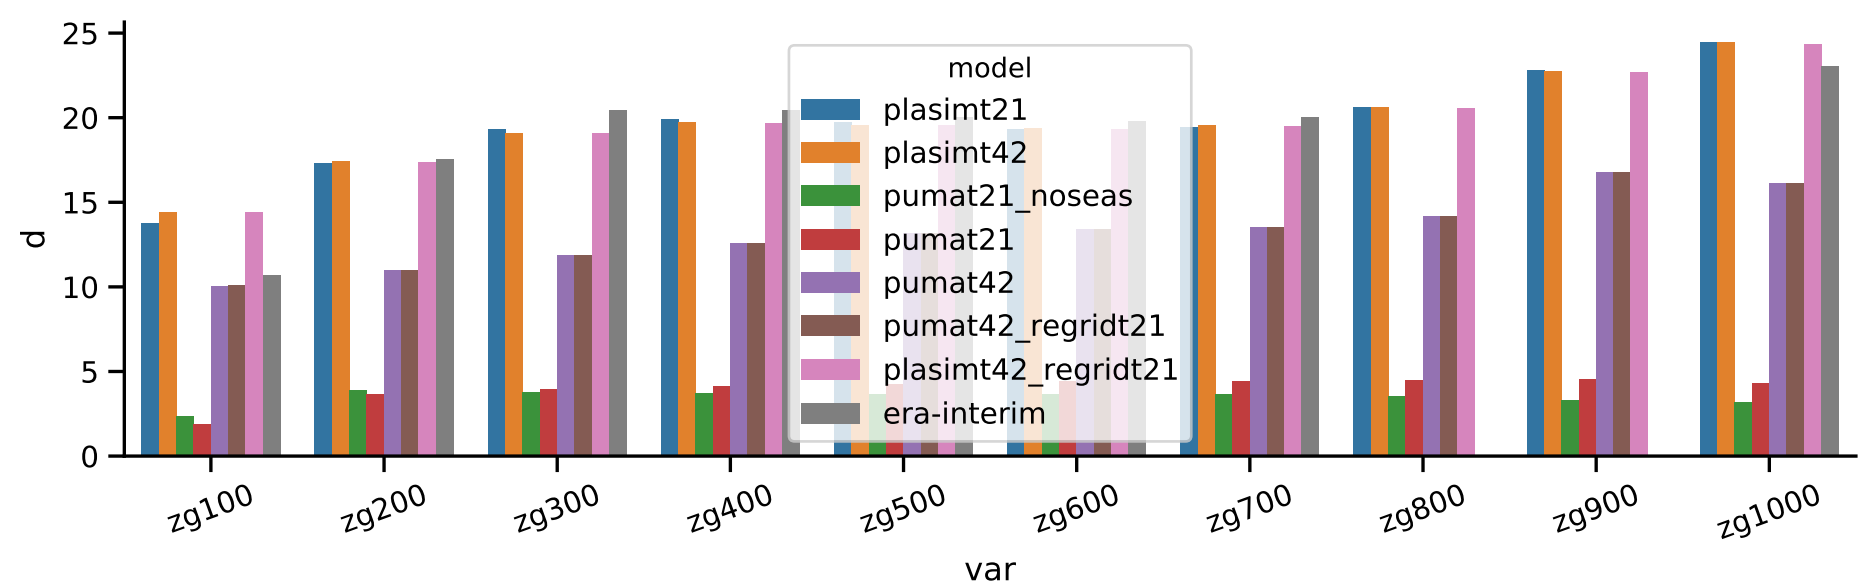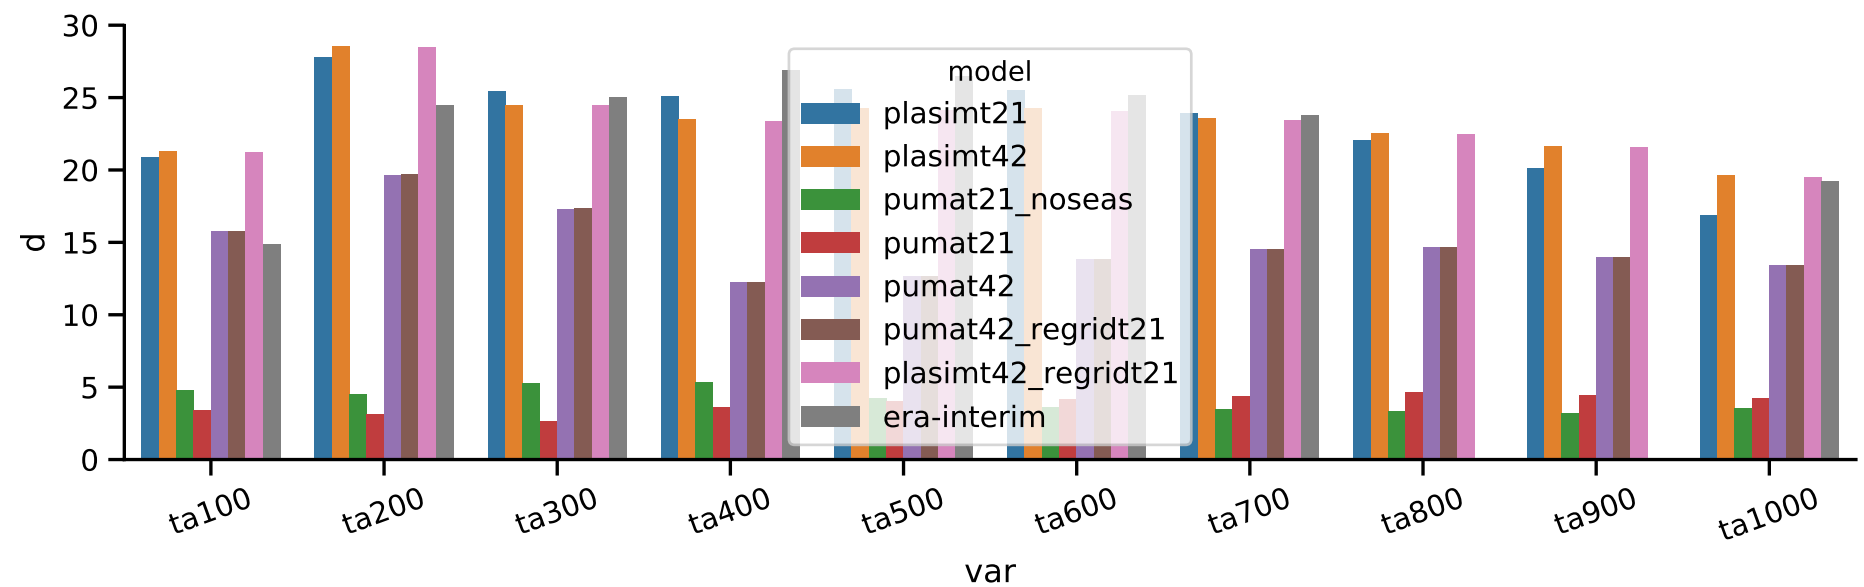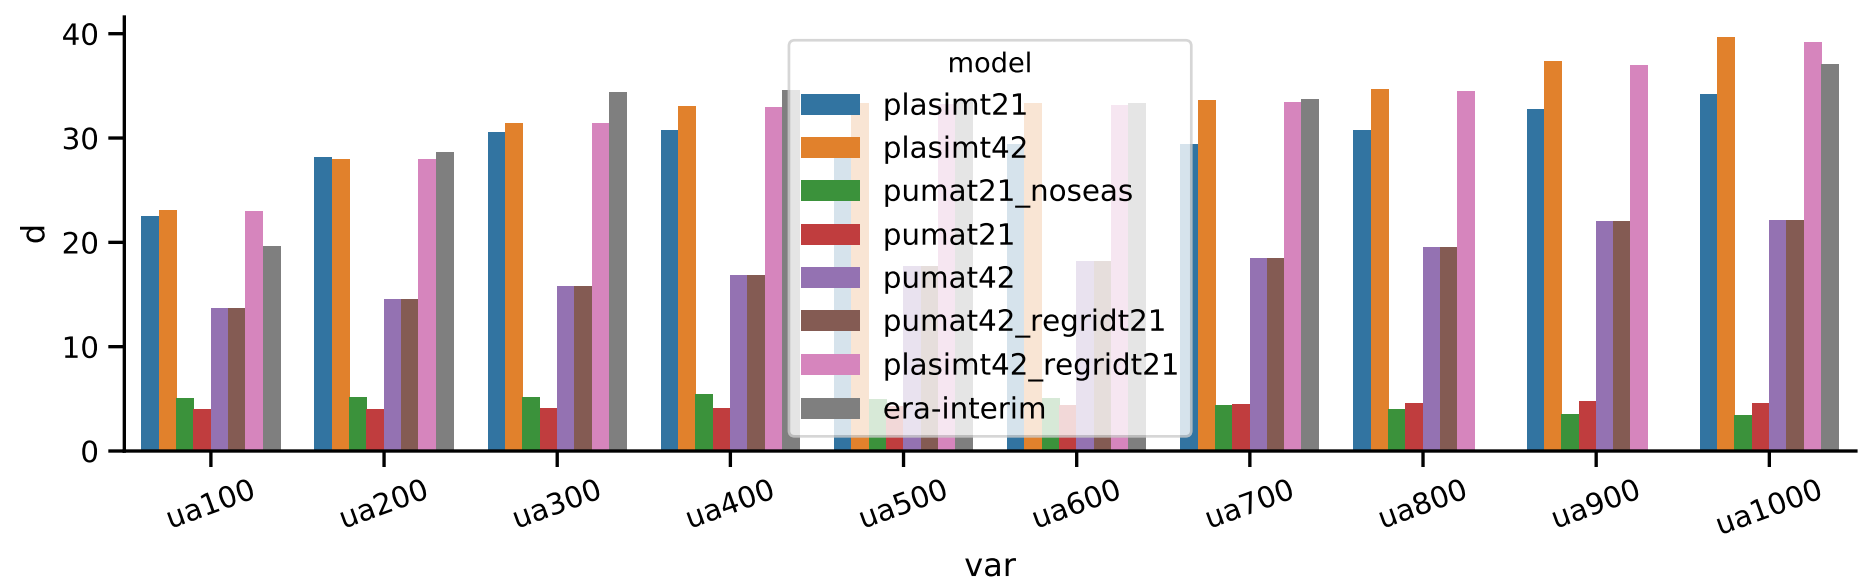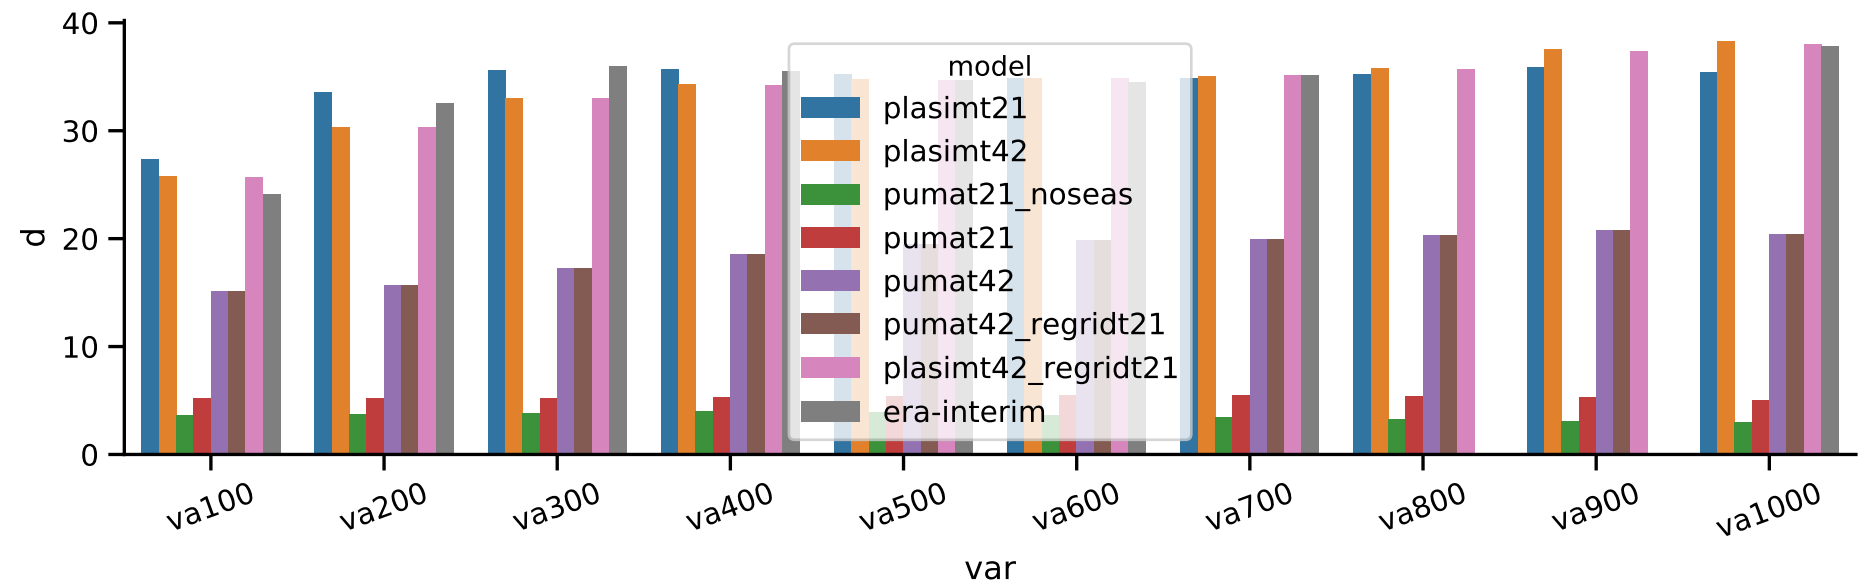

Supplement: Supplementary file 2 [file fig_S11_d_barplot_puma_plasim_allvars.pdf › supplement/supplement_plots/fig_S11_d_barplot_puma_plasim_allvars.pdf]

pumat21\_noseas leadday 6

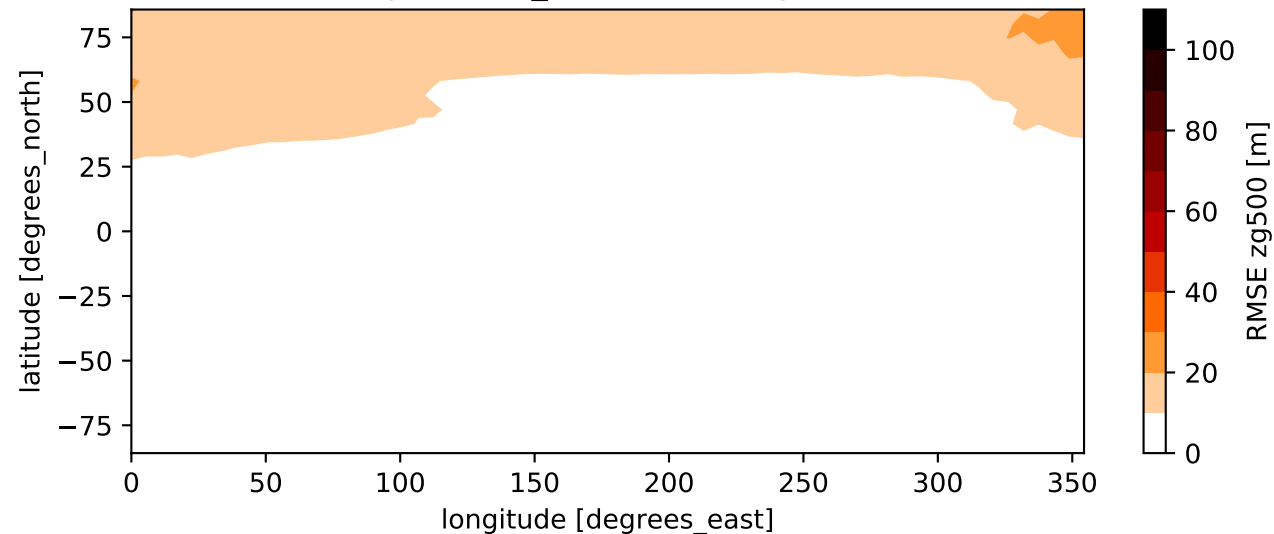

Supplement: Supplementary file 3 [file fig_S12_rmse_2d_pumat21_noseas_zg500_leadtime6.pdf › supplement/supplement_plots/fig_S12_rmse_2d_pumat21_noseas_zg500_leadtime6.pdf]

gcm 500hPa height mean

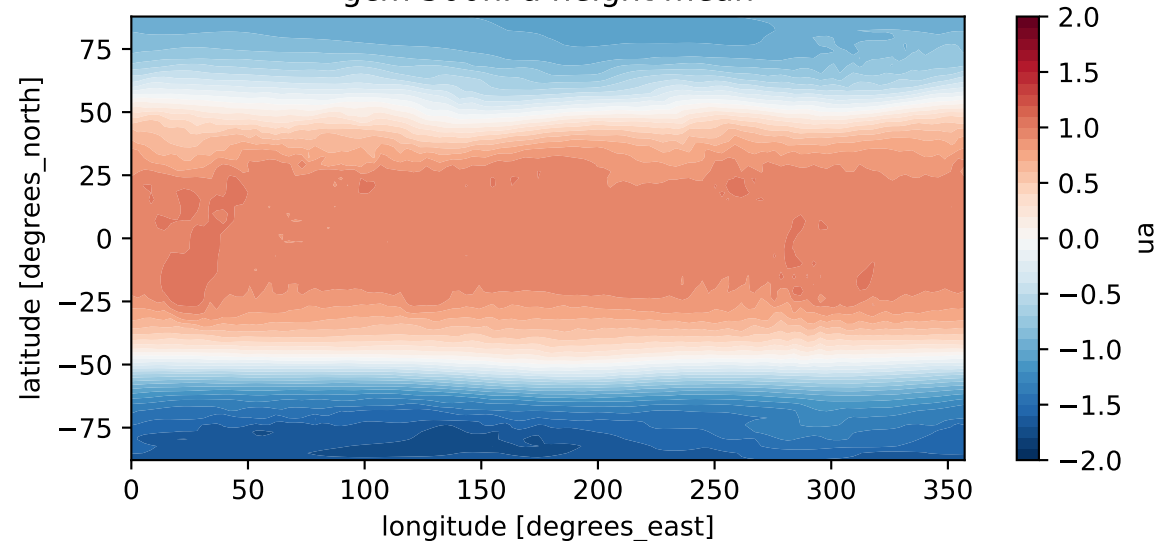

Supplement: Supplementary file 4 [file fig_S13_model_climmean_plasimt42.pdf › supplement/supplement_plots/fig_S13_model_climmean_plasimt42.pdf]

gcm 500hPa height mean

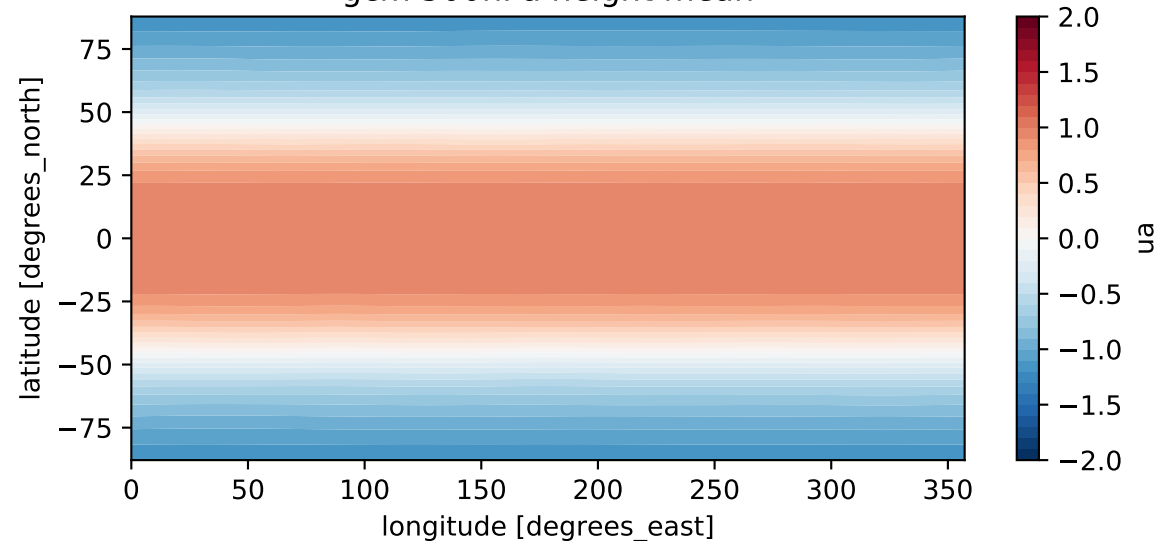

Supplement: Supplementary file 5 [file fig_S14_model_climmean_pumat42.pdf › supplement/supplement_plots/fig_S14_model_climmean_pumat42.pdf]

network 500hPa height mean

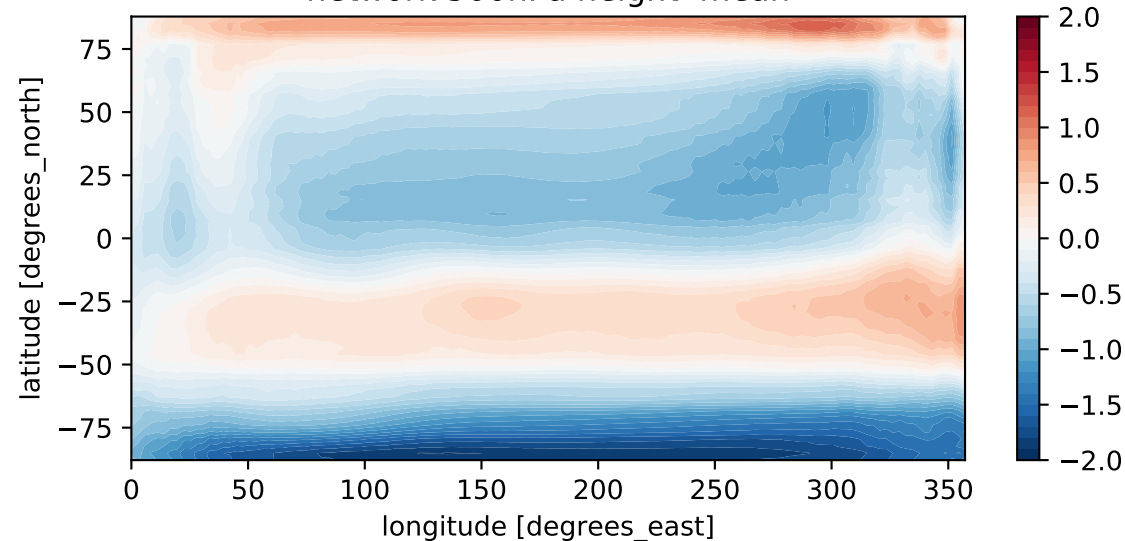

Supplement: Supplementary file 6 [file fig_S15_network_climmean1climnetplasimt42_30_0_100_10.pdf › supplement/supplement_plots/fig_S15_network_climmean1climnetplasimt42_30_0_100_10.pdf]

network 500hPa height mean

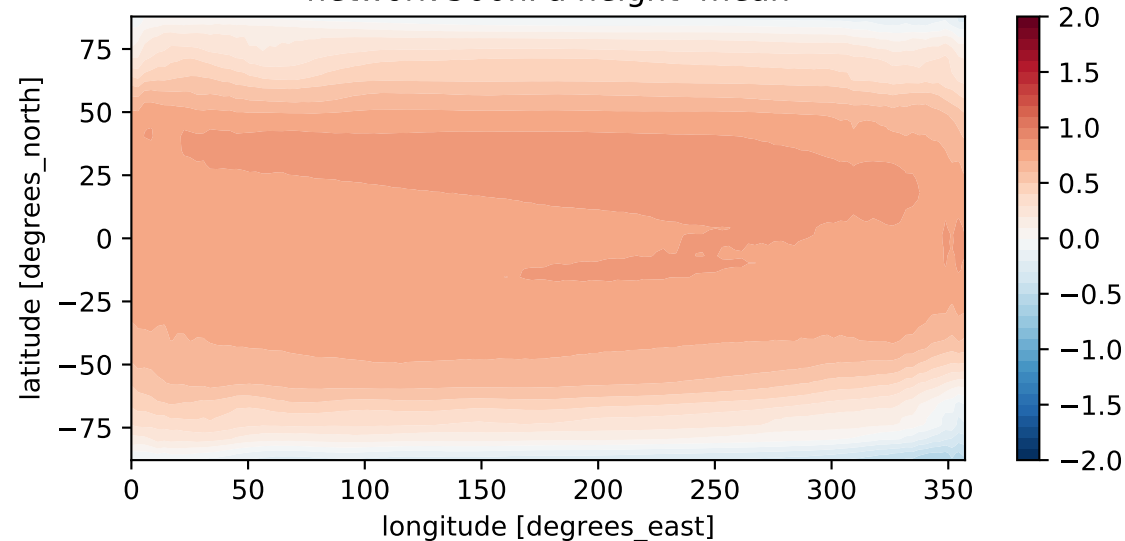

Supplement: Supplementary file 7 [file fig_S16_network_climmean1climnetplasimt42_100_0_100_10.pdf › supplement/supplement_plots/fig_S16_network_climmean1climnetplasimt42_100_0_100_10.pdf]

network 500hPa height mean

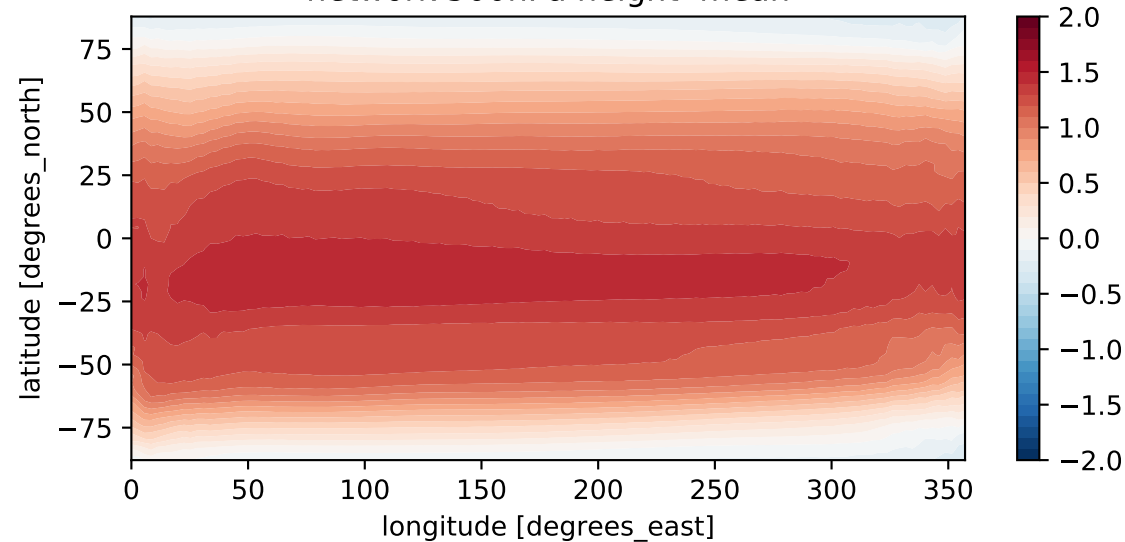

Supplement: Supplementary file 8 [file fig_S17_network_climmean1climnetpumat42_30_0_100_10.pdf › supplement/supplement_plots/fig_S17_network_climmean1climnetpumat42_30_0_100_10.pdf]

network 500hPa height mean

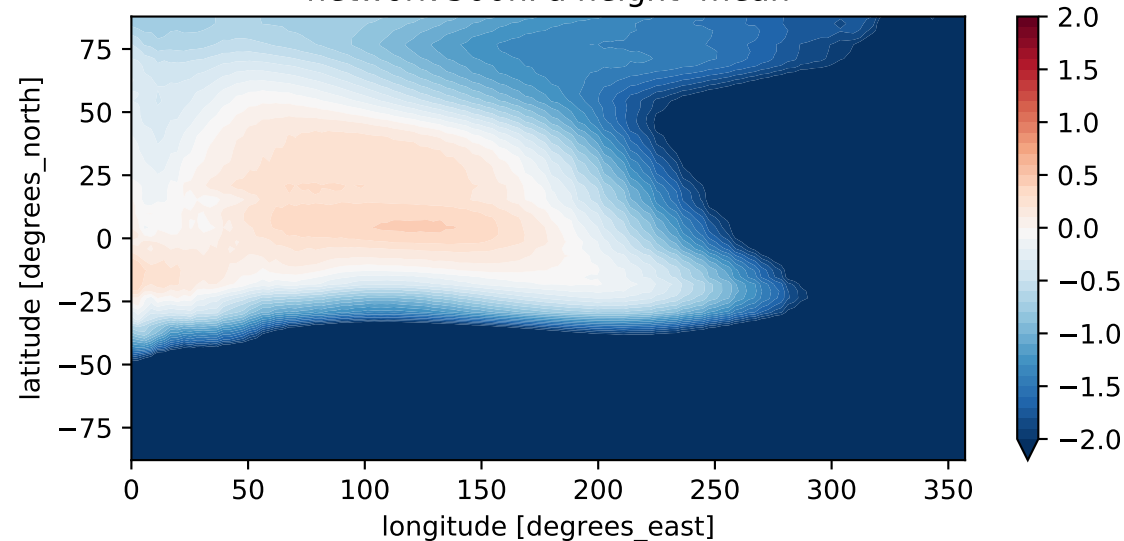

Supplement: Supplementary file 9 [file fig_S18_network_climmean1climnetpumat42_100_0_100_10.pdf › supplement/supplement_plots/fig_S18_network_climmean1climnetpumat42_100_0_100_10.pdf]

ta800 3600 daymean

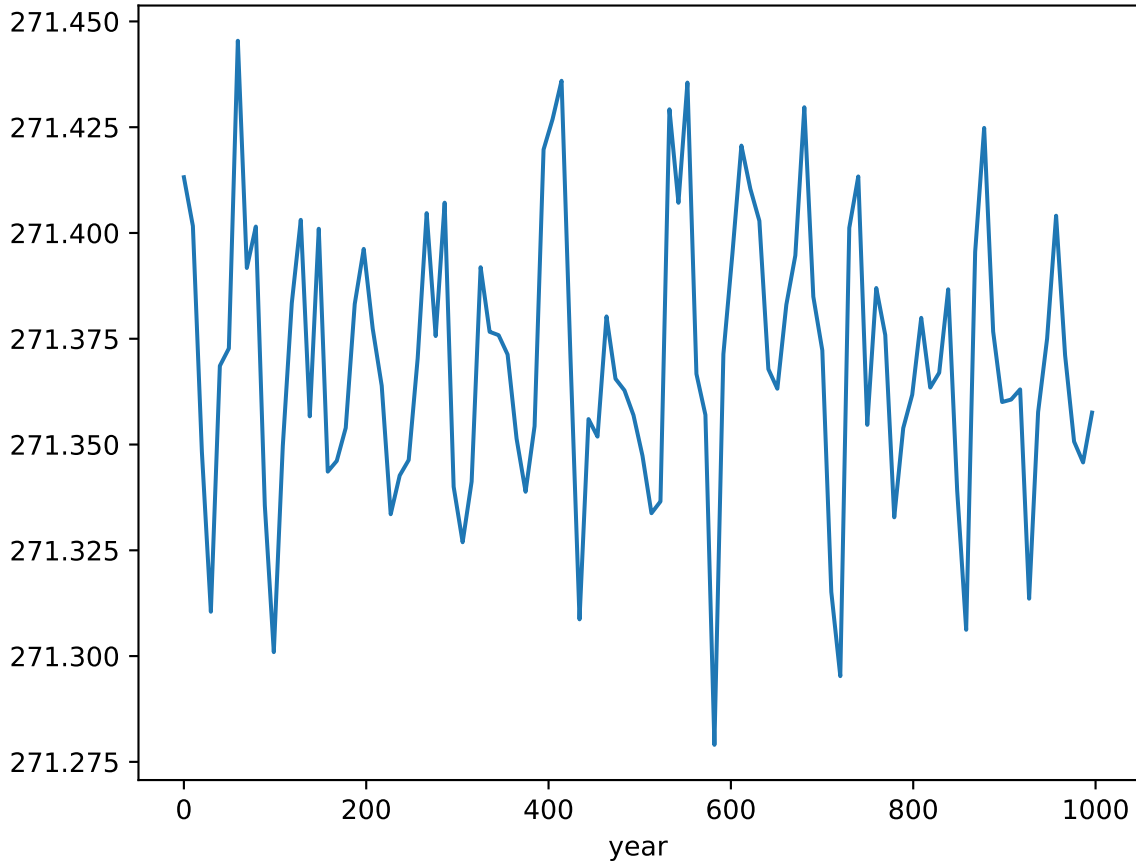

Supplement: Supplementary file 10 [file fig_S1_model_drift_plasimt21_ta800.pdf › supplement/supplement_plots/fig_S1_model_drift_plasimt21_ta800.pdf]

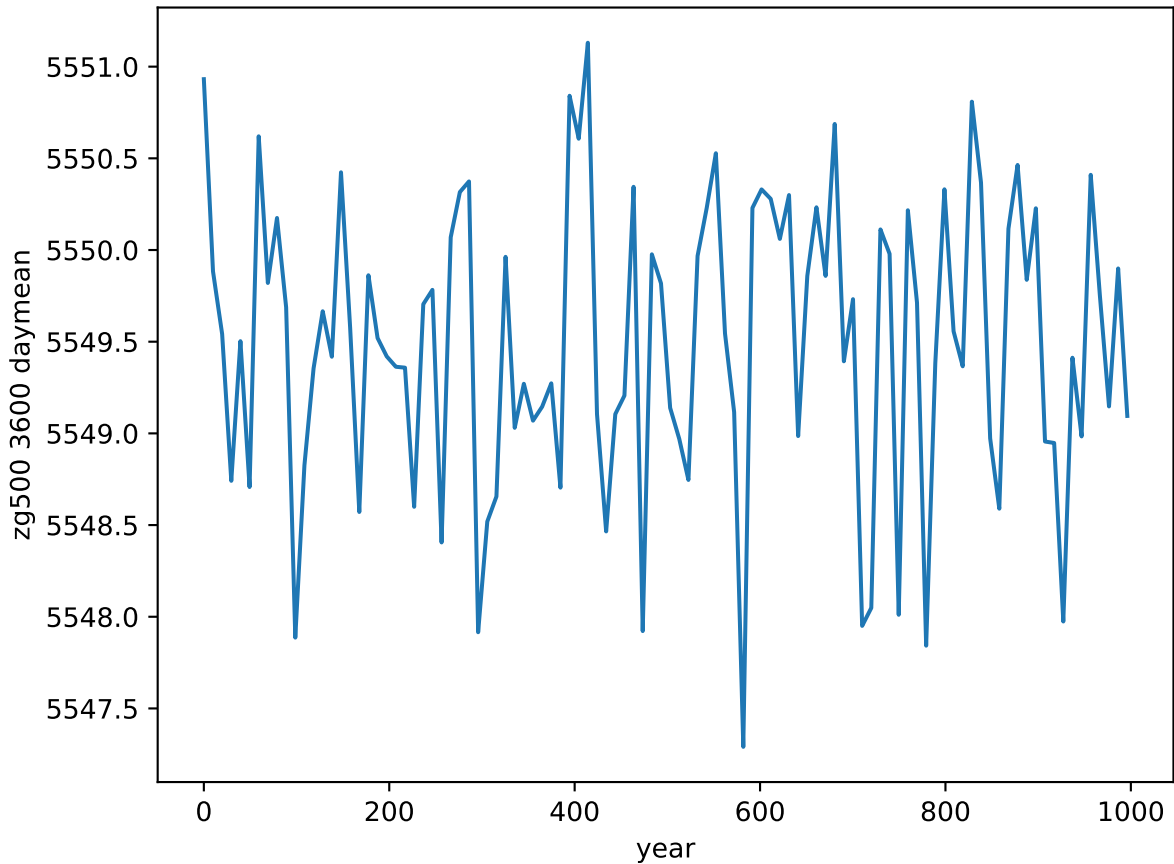

Supplement: Supplementary file 11 [file fig_S2_model_drift_plasimt21_zg500.pdf › supplement/supplement_plots/fig_S2_model_drift_plasimt21_zg500.pdf]

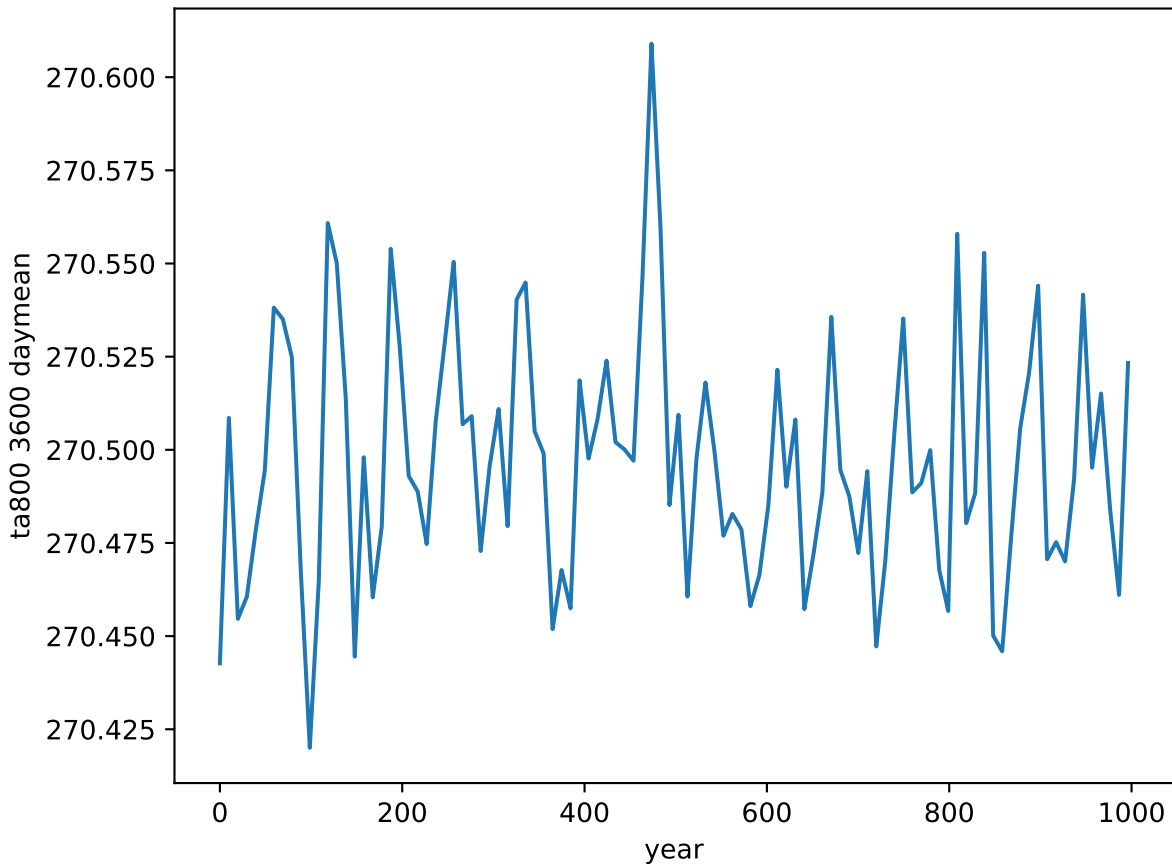

Supplement: Supplementary file 12 [file fig_S3_model_drift_plasimt42_ta800.pdf › supplement/supplement_plots/fig_S3_model_drift_plasimt42_ta800.pdf]

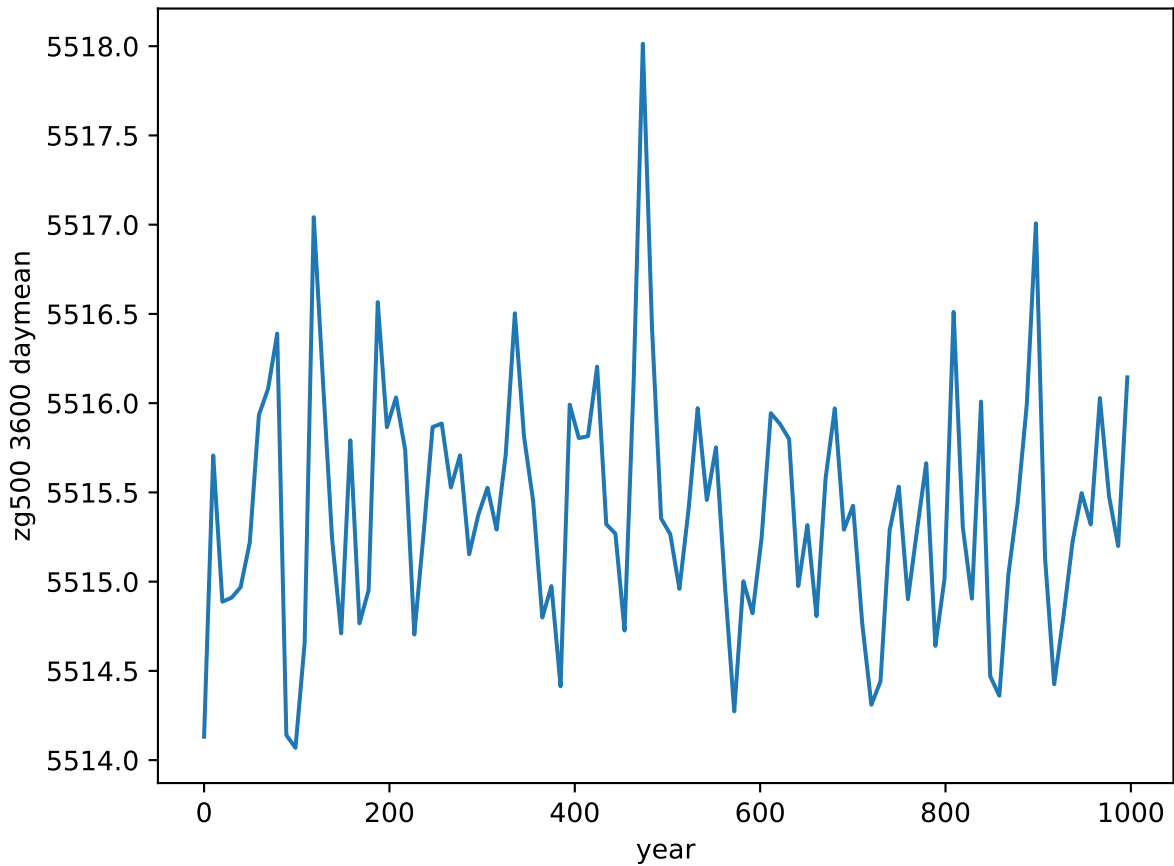

Supplement: Supplementary file 13 [file fig_S4_model_drift_plasimt42_zg500.pdf › supplement/supplement_plots/fig_S4_model_drift_plasimt42_zg500.pdf]

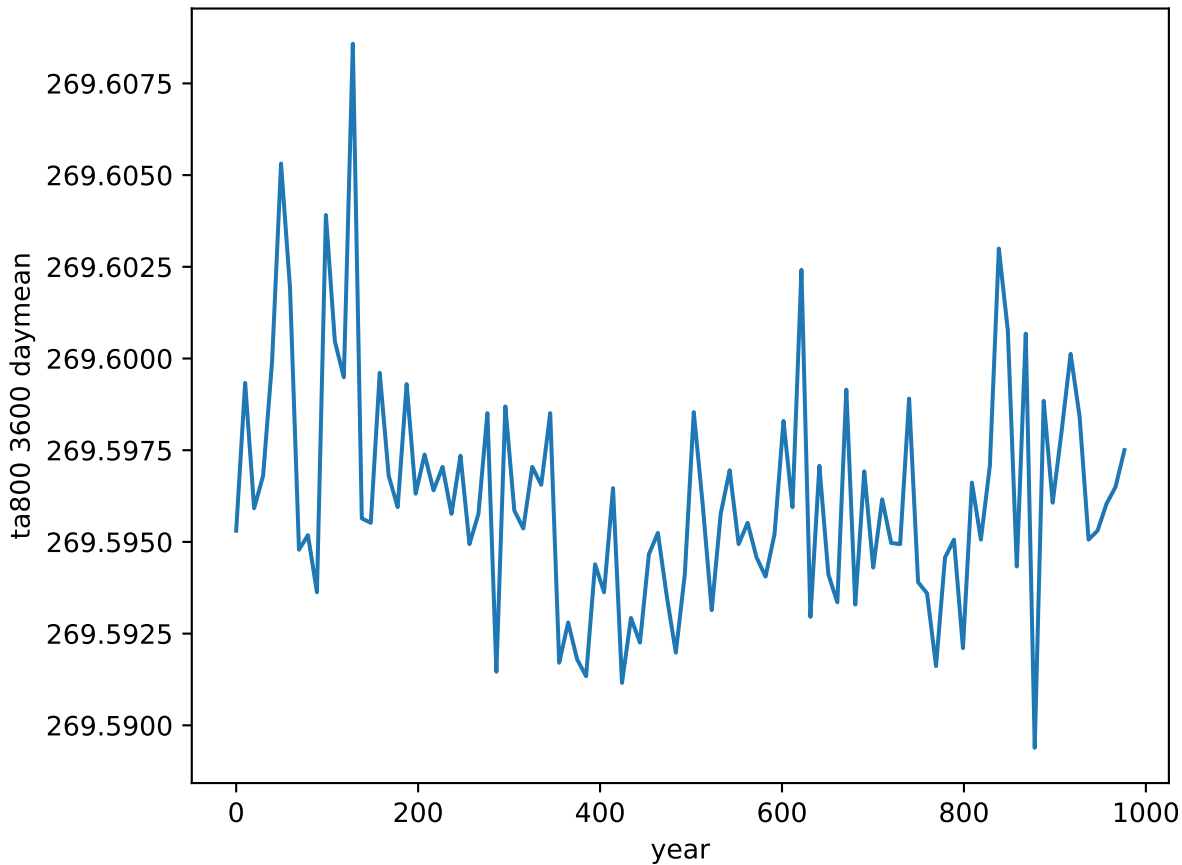

Supplement: Supplementary file 14 [file fig_S5_model_drift_pumat21_noseas_ta800.pdf › supplement/supplement_plots/fig_S5_model_drift_pumat21_noseas_ta800.pdf]

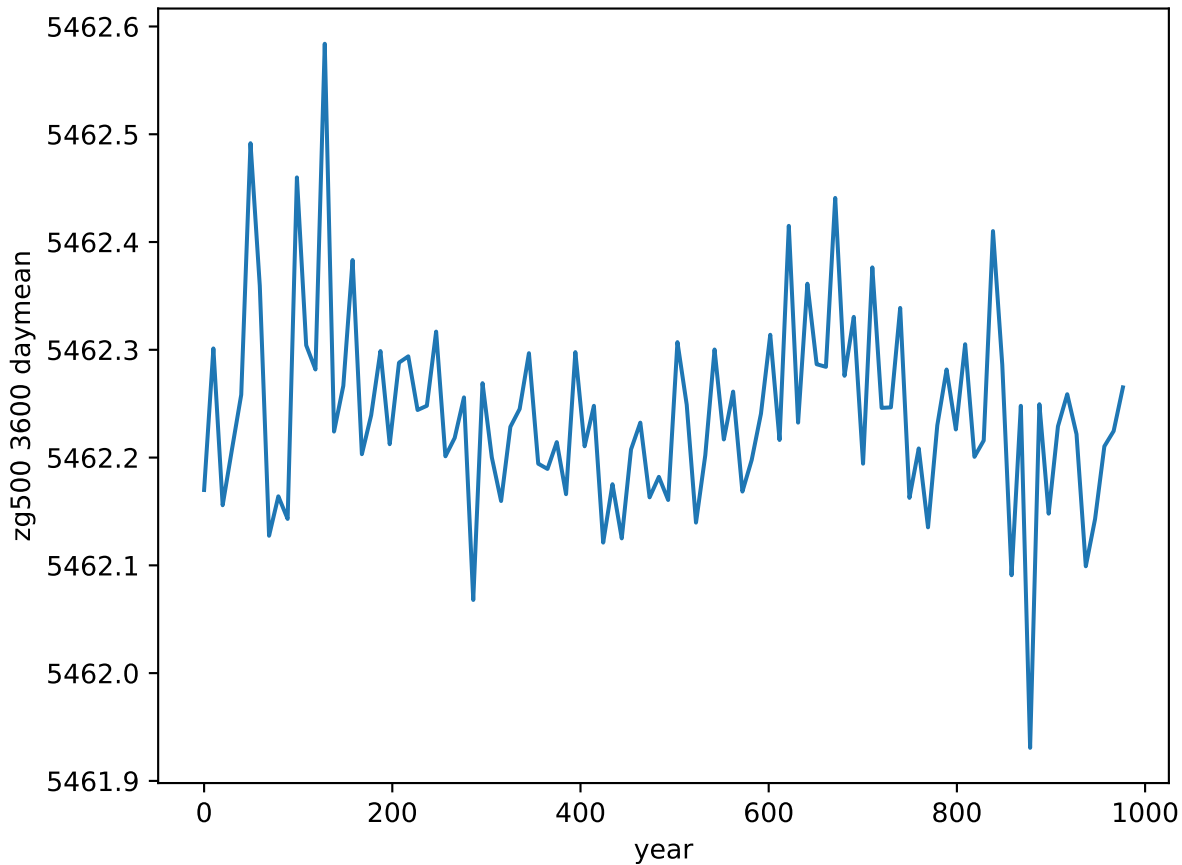

Supplement: Supplementary file 15 [file fig_S6_model_drift_pumat21_noseas_zg500.pdf › supplement/supplement_plots/fig_S6_model_drift_pumat21_noseas_zg500.pdf]

+2.686e2

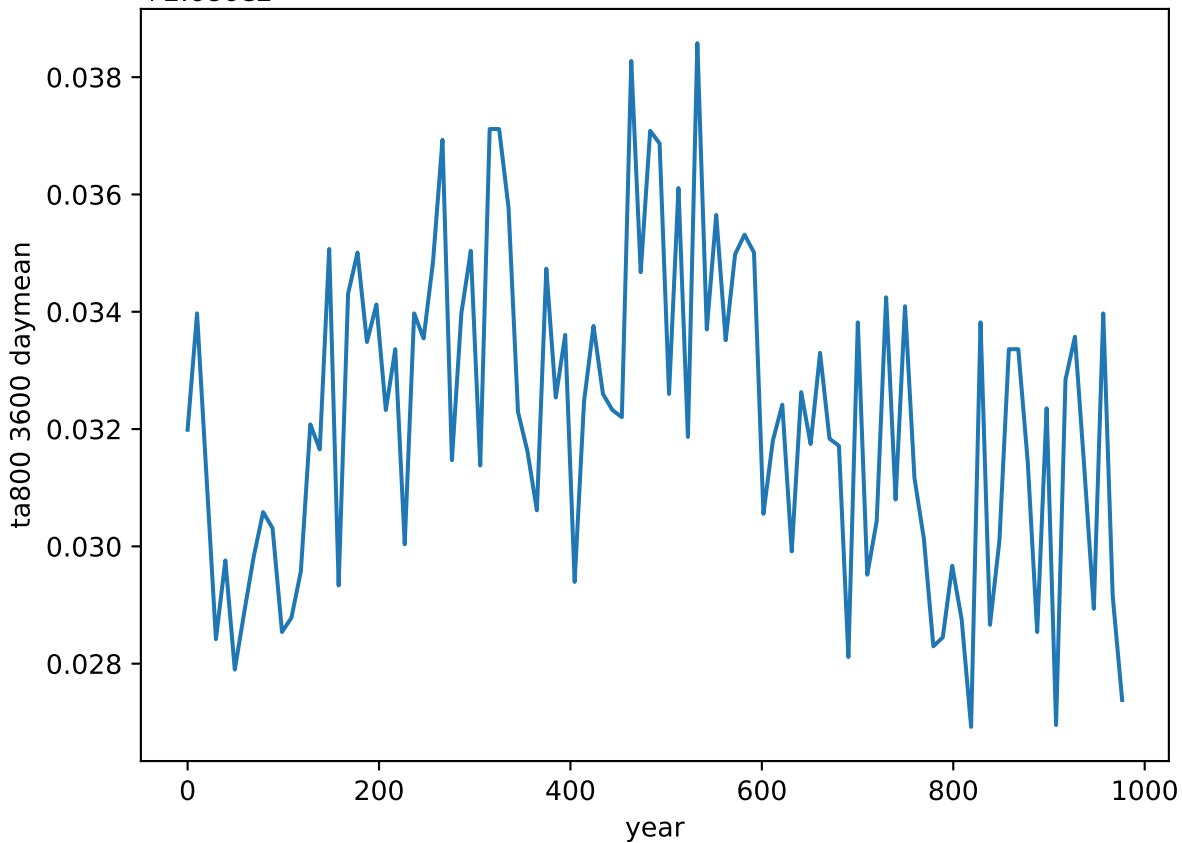

Supplement: Supplementary file 16 [file fig_S7_model_drift_pumat21_ta800.pdf › supplement/supplement_plots/fig_S7_model_drift_pumat21_ta800.pdf]

+5.445e3

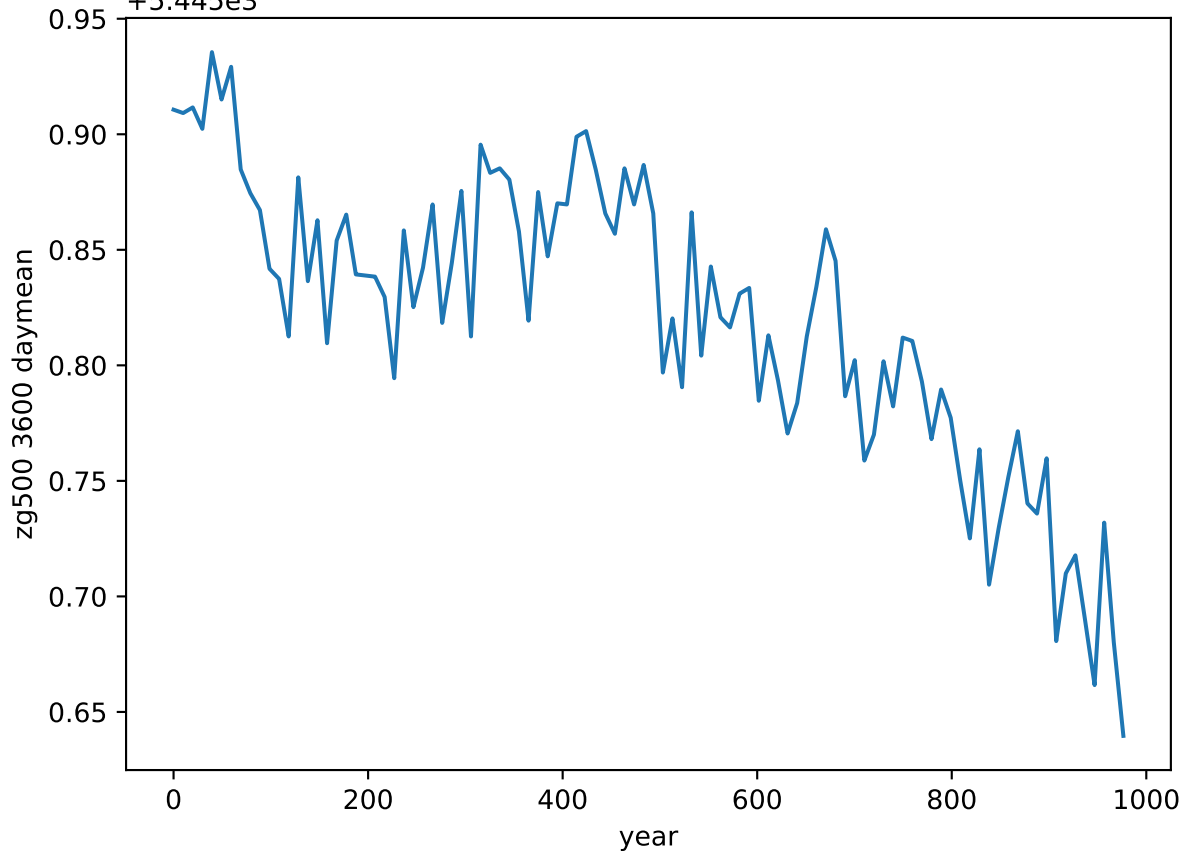

Supplement: Supplementary file 17 [file fig_S8_model_drift_pumat21_zg500.pdf › supplement/supplement_plots/fig_S8_model_drift_pumat21_zg500.pdf]

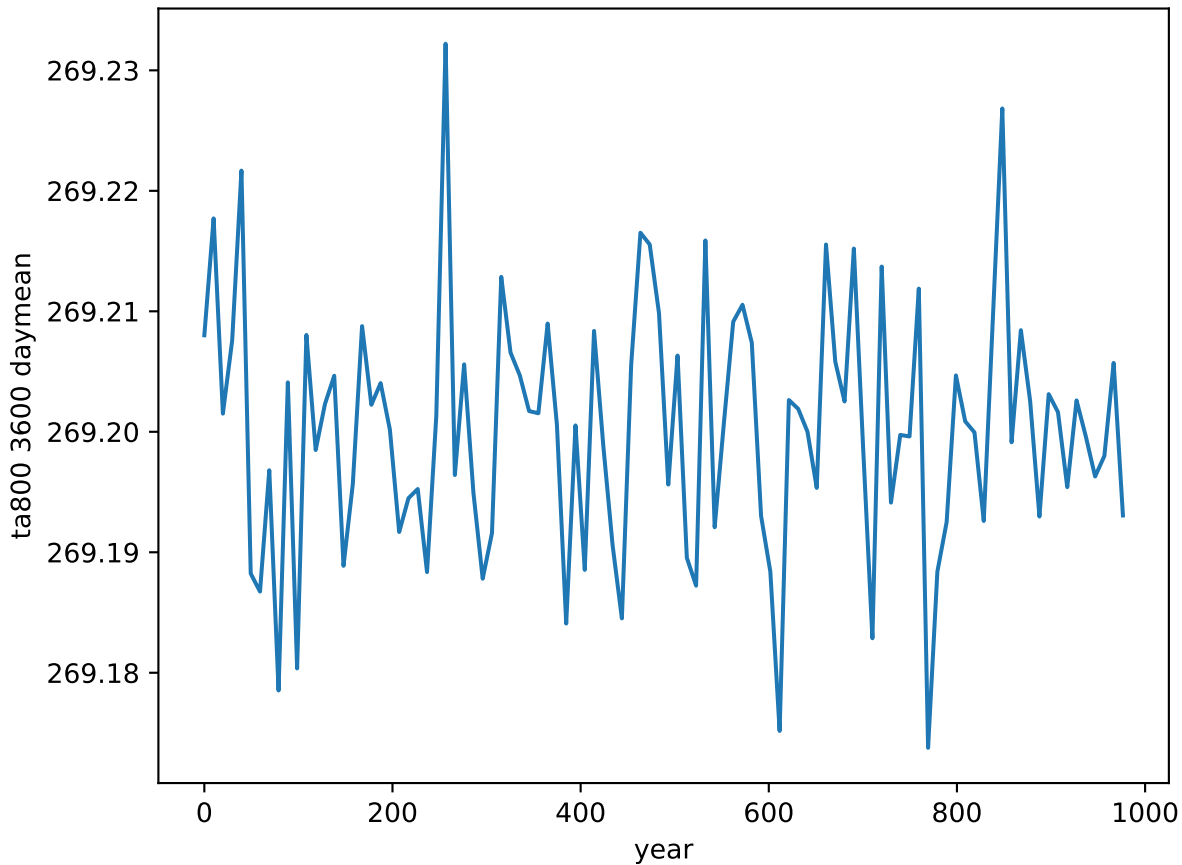

Supplement: Supplementary file 18 [file fig_S9_model_drift_pumat42_ta800.pdf › supplement/supplement_plots/fig_S9_model_drift_pumat42_ta800.pdf]
